# Supplementary material for: Endozoicomonas dominance and Vibrionaceae stability underpin resilience in urban coral Madracis auretenra
Source: PeerJ. 2025 Apr 15;13:e19226. doi: 10.7717/peerj.19226 (PMC12007501; doi:10.7717/peerj.19226)
Supplement: Supplemental Information 3 [file peerj-13-19226-s003.xlsx]

## Sheet: metadata-14398282-processed-ok
Accession
SRR28786350	SRP503687	new	PRJNA1103847	SAMN41063004	1256-392	16S rRNA V4 of Madracis auretenra: coral microbiome	AMPLICON	METAGENOMIC	ChIP	paired	ILLUMINA	Illumina MiSeq	16S rRNA V4 two-step PCR, CS1 and CS2 adapters	fastq	1256-392-Ma-1_S181_L001_R1_001.fastq	1256-392-Ma-1_S181_L001_R2_001.fastq
SRR28786349	SRP503687	new	PRJNA1103847	SAMN41063005	1256-393	16S rRNA V4 of Madracis auretenra: coral microbiome	AMPLICON	METAGENOMIC	ChIP	paired	ILLUMINA	Illumina MiSeq	16S rRNA V4 two-step PCR, CS1 and CS2 adapters	fastq	1256-393-Ma-2_S182_L001_R1_001.fastq	1256-393-Ma-2_S182_L001_R2_001.fastq
SRR28786338	SRP503687	new	PRJNA1103847	SAMN41063006	1256-394	16S rRNA V4 of Madracis auretenra: coral microbiome	AMPLICON	METAGENOMIC	ChIP	paired	ILLUMINA	Illumina MiSeq	16S rRNA V4 two-step PCR, CS1 and CS2 adapters	fastq	1256-394-Ma-3_S183_L001_R1_001.fastq	1256-394-Ma-3_S183_L001_R2_001.fastq
SRR28786327	SRP503687	new	PRJNA1103847	SAMN41063007	1256-395	16S rRNA V4 of Madracis auretenra: coral microbiome	AMPLICON	METAGENOMIC	ChIP	paired	ILLUMINA	Illumina MiSeq	16S rRNA V4 two-step PCR, CS1 and CS2 adapters	fastq	1256-395-Ma-4_S184_L001_R1_001.fastq	1256-395-Ma-4_S184_L001_R2_001.fastq
SRR28786308	SRP503687	new	PRJNA1103847	SAMN41063008	1256-396	16S rRNA V4 of Madracis auretenra: coral microbiome	AMPLICON	METAGENOMIC	ChIP	paired	ILLUMINA	Illumina MiSeq	16S rRNA V4 two-step PCR, CS1 and CS2 adapters	fastq	1256-396-Ma-5_S185_L001_R1_001.fastq	1256-396-Ma-5_S185_L001_R2_001.fastq
SRR28786297	SRP503687	new	PRJNA1103847	SAMN41063009	1256-397	16S rRNA V4 of Madracis auretenra: coral microbiome	AMPLICON	METAGENOMIC	ChIP	paired	ILLUMINA	Illumina MiSeq	16S rRNA V4 two-step PCR, CS1 and CS2 adapters	fastq	1256-397-Ma-6_S186_L001_R1_001.fastq	1256-397-Ma-6_S186_L001_R2_001.fastq
SRR28786286	SRP503687	new	PRJNA1103847	SAMN41063010	1256-398	16S rRNA V4 of Madracis auretenra: coral microbiome	AMPLICON	METAGENOMIC	ChIP	paired	ILLUMINA	Illumina MiSeq	16S rRNA V4 two-step PCR, CS1 and CS2 adapters	fastq	1256-398-Ma-7_S187_L001_R1_001.fastq	1256-398-Ma-7_S187_L001_R2_001.fastq
SRR28786315	SRP503687	new	PRJNA1103847	SAMN41063011	1256-399	16S rRNA V4 of Madracis auretenra: coral microbiome	AMPLICON	METAGENOMIC	ChIP	paired	ILLUMINA	Illumina MiSeq	16S rRNA V4 two-step PCR, CS1 and CS2 adapters	fastq	1256-399-Ma-8_S188_L001_R1_001.fastq	1256-399-Ma-8_S188_L001_R2_001.fastq
SRR28786312	SRP503687	new	PRJNA1103847	SAMN41063012	1256-400	16S rRNA V4 of Madracis auretenra: coral microbiome	AMPLICON	METAGENOMIC	ChIP	paired	ILLUMINA	Illumina MiSeq	16S rRNA V4 two-step PCR, CS1 and CS2 adapters	fastq	1256-400-Ma-9_S189_L001_R1_001.fastq	1256-400-Ma-9_S189_L001_R2_001.fastq
SRR28786311	SRP503687	new	PRJNA1103847	SAMN41063013	1256-401	16S rRNA V4 of Madracis auretenra: coral microbiome	AMPLICON	METAGENOMIC	ChIP	paired	ILLUMINA	Illumina MiSeq	16S rRNA V4 two-step PCR, CS1 and CS2 adapters	fastq	1256-401-Ma-10_S190_L001_R1_001.fastq	1256-401-Ma-10_S190_L001_R2_001.fastq
SRR28786348	SRP503687	new	PRJNA1103847	SAMN41063014	1256-402	16S rRNA V4 of Madracis auretenra: coral microbiome	AMPLICON	METAGENOMIC	ChIP	paired	ILLUMINA	Illumina MiSeq	16S rRNA V4 two-step PCR, CS1 and CS2 adapters	fastq	1256-402-Ma-11_S191_L001_R1_001.fastq	1256-402-Ma-11_S191_L001_R2_001.fastq
SRR28786347	SRP503687	new	PRJNA1103847	SAMN41063015	1256-403	16S rRNA V4 of Madracis auretenra: coral microbiome	AMPLICON	METAGENOMIC	ChIP	paired	ILLUMINA	Illumina MiSeq	16S rRNA V4 two-step PCR, CS1 and CS2 adapters	fastq	1256-403-Ma-12_S192_L001_R1_001.fastq	1256-403-Ma-12_S192_L001_R2_001.fastq
SRR28786346	SRP503687	new	PRJNA1103847	SAMN41063016	1256-404	16S rRNA V4 of Madracis auretenra: coral microbiome	AMPLICON	METAGENOMIC	ChIP	paired	ILLUMINA	Illumina MiSeq	16S rRNA V4 two-step PCR, CS1 and CS2 adapters	fastq	1256-404-Ma-13_S193_L001_R1_001.fastq	1256-404-Ma-13_S193_L001_R2_001.fastq
SRR28786345	SRP503687	new	PRJNA1103847	SAMN41063017	1256-405	16S rRNA V4 of Madracis auretenra: coral microbiome	AMPLICON	METAGENOMIC	ChIP	paired	ILLUMINA	Illumina MiSeq	16S rRNA V4 two-step PCR, CS1 and CS2 adapters	fastq	1256-405-Ma-14_S194_L001_R1_001.fastq	1256-405-Ma-14_S194_L001_R2_001.fastq
SRR28786344	SRP503687	new	PRJNA1103847	SAMN41063018	1256-406	16S rRNA V4 of Madracis auretenra: coral microbiome	AMPLICON	METAGENOMIC	ChIP	paired	ILLUMINA	Illumina MiSeq	16S rRNA V4 two-step PCR, CS1 and CS2 adapters	fastq	1256-406-Ma-15_S195_L001_R1_001.fastq	1256-406-Ma-15_S195_L001_R2_001.fastq
SRR28786343	SRP503687	new	PRJNA1103847	SAMN41063019	1256-407	16S rRNA V4 of Madracis auretenra: coral microbiome	AMPLICON	METAGENOMIC	ChIP	paired	ILLUMINA	Illumina MiSeq	16S rRNA V4 two-step PCR, CS1 and CS2 adapters	fastq	1256-407-Ma-16_S196_L001_R1_001.fastq	1256-407-Ma-16_S196_L001_R2_001.fastq
SRR28786342	SRP503687	new	PRJNA1103847	SAMN41063020	1256-408	16S rRNA V4 of Madracis auretenra: coral microbiome	AMPLICON	METAGENOMIC	ChIP	paired	ILLUMINA	Illumina MiSeq	16S rRNA V4 two-step PCR, CS1 and CS2 adapters	fastq	1256-408-Ma-17_S197_L001_R1_001.fastq	1256-408-Ma-17_S197_L001_R2_001.fastq
SRR28786341	SRP503687	new	PRJNA1103847	SAMN41063021	1256-409	16S rRNA V4 of Madracis auretenra: coral microbiome	AMPLICON	METAGENOMIC	ChIP	paired	ILLUMINA	Illumina MiSeq	16S rRNA V4 two-step PCR, CS1 and CS2 adapters	fastq	1256-409-Ma-18_S198_L001_R1_001.fastq	1256-409-Ma-18_S198_L001_R2_001.fastq
SRR28786340	SRP503687	new	PRJNA1103847	SAMN41063022	1256-410	16S rRNA V4 of Madracis auretenra: coral microbiome	AMPLICON	METAGENOMIC	ChIP	paired	ILLUMINA	Illumina MiSeq	16S rRNA V4 two-step PCR, CS1 and CS2 adapters	fastq	1256-410-Ma-19_S199_L001_R1_001.fastq	1256-410-Ma-19_S199_L001_R2_001.fastq
SRR28786339	SRP503687	new	PRJNA1103847	SAMN41063023	1256-411	16S rRNA V4 of Madracis auretenra: coral microbiome	AMPLICON	METAGENOMIC	ChIP	paired	ILLUMINA	Illumina MiSeq	16S rRNA V4 two-step PCR, CS1 and CS2 adapters	fastq	1256-411-Ma-20_S200_L001_R1_001.fastq	1256-411-Ma-20_S200_L001_R2_001.fastq
SRR28786337	SRP503687	new	PRJNA1103847	SAMN41063024	1256-412	16S rRNA V4 of Madracis auretenra: coral microbiome	AMPLICON	METAGENOMIC	ChIP	paired	ILLUMINA	Illumina MiSeq	16S rRNA V4 two-step PCR, CS1 and CS2 adapters	fastq	1256-412-Ma-21_S201_L001_R1_001.fastq	1256-412-Ma-21_S201_L001_R2_001.fastq
SRR28786336	SRP503687	new	PRJNA1103847	SAMN41063025	1256-413	16S rRNA V4 of Madracis auretenra: coral microbiome	AMPLICON	METAGENOMIC	ChIP	paired	ILLUMINA	Illumina MiSeq	16S rRNA V4 two-step PCR, CS1 and CS2 adapters	fastq	1256-413-Ma-22_S202_L001_R1_001.fastq	1256-413-Ma-22_S202_L001_R2_001.fastq
SRR28786335	SRP503687	new	PRJNA1103847	SAMN41063026	1256-414	16S rRNA V4 of Madracis auretenra: coral microbiome	AMPLICON	METAGENOMIC	ChIP	paired	ILLUMINA	Illumina MiSeq	16S rRNA V4 two-step PCR, CS1 and CS2 adapters	fastq	1256-414-Ma-23_S203_L001_R1_001.fastq	1256-414-Ma-23_S203_L001_R2_001.fastq
SRR28786334	SRP503687	new	PRJNA1103847	SAMN41063027	1256-415	16S rRNA V4 of Madracis auretenra: coral microbiome	AMPLICON	METAGENOMIC	ChIP	paired	ILLUMINA	Illumina MiSeq	16S rRNA V4 two-step PCR, CS1 and CS2 adapters	fastq	1256-415-Ma-24_S204_L001_R1_001.fastq	1256-415-Ma-24_S204_L001_R2_001.fastq
SRR28786333	SRP503687	new	PRJNA1103847	SAMN41063028	1256-416	16S rRNA V4 of Madracis auretenra: coral microbiome	AMPLICON	METAGENOMIC	ChIP	paired	ILLUMINA	Illumina MiSeq	16S rRNA V4 two-step PCR, CS1 and CS2 adapters	fastq	1256-416-Ma-25_S205_L001_R1_001.fastq	1256-416-Ma-25_S205_L001_R2_001.fastq
SRR28786332	SRP503687	new	PRJNA1103847	SAMN41063029	1256-417	16S rRNA V4 of Madracis auretenra: coral microbiome	AMPLICON	METAGENOMIC	ChIP	paired	ILLUMINA	Illumina MiSeq	16S rRNA V4 two-step PCR, CS1 and CS2 adapters	fastq	1256-417-Ma-26_S206_L001_R1_001.fastq	1256-417-Ma-26_S206_L001_R2_001.fastq
SRR28786331	SRP503687	new	PRJNA1103847	SAMN41063030	1256-418	16S rRNA V4 of Madracis auretenra: coral microbiome	AMPLICON	METAGENOMIC	ChIP	paired	ILLUMINA	Illumina MiSeq	16S rRNA V4 two-step PCR, CS1 and CS2 adapters	fastq	1256-418-Ma-27_S207_L001_R1_001.fastq	1256-418-Ma-27_S207_L001_R2_001.fastq
SRR28786330	SRP503687	new	PRJNA1103847	SAMN41063031	1256-419	16S rRNA V4 of Madracis auretenra: coral microbiome	AMPLICON	METAGENOMIC	ChIP	paired	ILLUMINA	Illumina MiSeq	16S rRNA V4 two-step PCR, CS1 and CS2 adapters	fastq	1256-419-Ma-28_S208_L001_R1_001.fastq	1256-419-Ma-28_S208_L001_R2_001.fastq
SRR28786329	SRP503687	new	PRJNA1103847	SAMN41063032	1256-420	16S rRNA V4 of Madracis auretenra: coral microbiome	AMPLICON	METAGENOMIC	ChIP	paired	ILLUMINA	Illumina MiSeq	16S rRNA V4 two-step PCR, CS1 and CS2 adapters	fastq	1256-420-Ma-29_S209_L001_R1_001.fastq	1256-420-Ma-29_S209_L001_R2_001.fastq
SRR28786328	SRP503687	new	PRJNA1103847	SAMN41063033	1256-421	16S rRNA V4 of Madracis auretenra: coral microbiome	AMPLICON	METAGENOMIC	ChIP	paired	ILLUMINA	Illumina MiSeq	16S rRNA V4 two-step PCR, CS1 and CS2 adapters	fastq	1256-421-Ma-30_S210_L001_R1_001.fastq	1256-421-Ma-30_S210_L001_R2_001.fastq
SRR28786326	SRP503687	new	PRJNA1103847	SAMN41063034	1256-422	16S rRNA V4 of Madracis auretenra: coral microbiome	AMPLICON	METAGENOMIC	ChIP	paired	ILLUMINA	Illumina MiSeq	16S rRNA V4 two-step PCR, CS1 and CS2 adapters	fastq	1256-422-Ma-31_S211_L001_R1_001.fastq	1256-422-Ma-31_S211_L001_R2_001.fastq
SRR28786325	SRP503687	new	PRJNA1103847	SAMN41063035	1256-423	16S rRNA V4 of Madracis auretenra: coral microbiome	AMPLICON	METAGENOMIC	ChIP	paired	ILLUMINA	Illumina MiSeq	16S rRNA V4 two-step PCR, CS1 and CS2 adapters	fastq	1256-423-Ma-32_S212_L001_R1_001.fastq	1256-423-Ma-32_S212_L001_R2_001.fastq
SRR28786324	SRP503687	new	PRJNA1103847	SAMN41063036	1256-424	16S rRNA V4 of surrounding seawater: seawater microbiome	AMPLICON	METAGENOMIC	ChIP	paired	ILLUMINA	Illumina MiSeq	16S rRNA V4 two-step PCR, CS1 and CS2 adapters	fastq	1256-424-Ma-33_S213_L001_R1_001.fastq	1256-424-Ma-33_S213_L001_R2_001.fastq
SRR28786323	SRP503687	new	PRJNA1103847	SAMN41063037	1256-425	16S rRNA V4 of surrounding seawater: seawater microbiome	AMPLICON	METAGENOMIC	ChIP	paired	ILLUMINA	Illumina MiSeq	16S rRNA V4 two-step PCR, CS1 and CS2 adapters	fastq	1256-425-Ma-34_S214_L001_R1_001.fastq	1256-425-Ma-34_S214_L001_R2_001.fastq
SRR28786322	SRP503687	new	PRJNA1103847	SAMN41063038	1256-426	16S rRNA V4 of surrounding seawater: seawater microbiome	AMPLICON	METAGENOMIC	ChIP	paired	ILLUMINA	Illumina MiSeq	16S rRNA V4 two-step PCR, CS1 and CS2 adapters	fastq	1256-426-Ma-35_S215_L001_R1_001.fastq	1256-426-Ma-35_S215_L001_R2_001.fastq
SRR28786321	SRP503687	new	PRJNA1103847	SAMN41063039	1256-427	16S rRNA V4 of surrounding seawater: seawater microbiome	AMPLICON	METAGENOMIC	ChIP	paired	ILLUMINA	Illumina MiSeq	16S rRNA V4 two-step PCR, CS1 and CS2 adapters	fastq	1256-427-Ma-36_S216_L001_R1_001.fastq	1256-427-Ma-36_S216_L001_R2_001.fastq
SRR28786320	SRP503687	new	PRJNA1103847	SAMN41063040	1256-428	16S rRNA V4 of Madracis auretenra: coral microbiome	AMPLICON	METAGENOMIC	ChIP	paired	ILLUMINA	Illumina MiSeq	16S rRNA V4 two-step PCR, CS1 and CS2 adapters	fastq	1256-428-Ma-37_S217_L001_R1_001.fastq	1256-428-Ma-37_S217_L001_R2_001.fastq
SRR28786319	SRP503687	new	PRJNA1103847	SAMN41063041	1256-429	16S rRNA V4 of Madracis auretenra: coral microbiome	AMPLICON	METAGENOMIC	ChIP	paired	ILLUMINA	Illumina MiSeq	16S rRNA V4 two-step PCR, CS1 and CS2 adapters	fastq	1256-429-Ma-38_S218_L001_R1_001.fastq	1256-429-Ma-38_S218_L001_R2_001.fastq
SRR28786310	SRP503687	new	PRJNA1103847	SAMN41063042	1256-430	16S rRNA V4 of Madracis auretenra: coral microbiome	AMPLICON	METAGENOMIC	ChIP	paired	ILLUMINA	Illumina MiSeq	16S rRNA V4 two-step PCR, CS1 and CS2 adapters	fastq	1256-430-Ma-39_S219_L001_R1_001.fastq	1256-430-Ma-39_S219_L001_R2_001.fastq
SRR28786309	SRP503687	new	PRJNA1103847	SAMN41063043	1256-431	16S rRNA V4 of Madracis auretenra: coral microbiome	AMPLICON	METAGENOMIC	ChIP	paired	ILLUMINA	Illumina MiSeq	16S rRNA V4 two-step PCR, CS1 and CS2 adapters	fastq	1256-431-Ma-40_S220_L001_R1_001.fastq	1256-431-Ma-40_S220_L001_R2_001.fastq
SRR28786307	SRP503687	new	PRJNA1103847	SAMN41063044	1256-432	16S rRNA V4 of Madracis auretenra: coral microbiome	AMPLICON	METAGENOMIC	ChIP	paired	ILLUMINA	Illumina MiSeq	16S rRNA V4 two-step PCR, CS1 and CS2 adapters	fastq	1256-432-Ma-41_S221_L001_R1_001.fastq	1256-432-Ma-41_S221_L001_R2_001.fastq
SRR28786306	SRP503687	new	PRJNA1103847	SAMN41063045	1256-433	16S rRNA V4 of Madracis auretenra: coral microbiome	AMPLICON	METAGENOMIC	ChIP	paired	ILLUMINA	Illumina MiSeq	16S rRNA V4 two-step PCR, CS1 and CS2 adapters	fastq	1256-433-Ma-42_S222_L001_R1_001.fastq	1256-433-Ma-42_S222_L001_R2_001.fastq
SRR28786305	SRP503687	new	PRJNA1103847	SAMN41063046	1256-434	16S rRNA V4 of Madracis auretenra: coral microbiome	AMPLICON	METAGENOMIC	ChIP	paired	ILLUMINA	Illumina MiSeq	16S rRNA V4 two-step PCR, CS1 and CS2 adapters	fastq	1256-434-Ma-43_S223_L001_R1_001.fastq	1256-434-Ma-43_S223_L001_R2_001.fastq
SRR28786304	SRP503687	new	PRJNA1103847	SAMN41063047	1256-435	16S rRNA V4 of Madracis auretenra: coral microbiome	AMPLICON	METAGENOMIC	ChIP	paired	ILLUMINA	Illumina MiSeq	16S rRNA V4 two-step PCR, CS1 and CS2 adapters	fastq	1256-435-Ma-44_S224_L001_R1_001.fastq	1256-435-Ma-44_S224_L001_R2_001.fastq
SRR28786303	SRP503687	new	PRJNA1103847	SAMN41063048	1256-436	16S rRNA V4 of Madracis auretenra: coral microbiome	AMPLICON	METAGENOMIC	ChIP	paired	ILLUMINA	Illumina MiSeq	16S rRNA V4 two-step PCR, CS1 and CS2 adapters	fastq	1256-436-Ma-45_S225_L001_R1_001.fastq	1256-436-Ma-45_S225_L001_R2_001.fastq
SRR28786302	SRP503687	new	PRJNA1103847	SAMN41063049	1256-437	16S rRNA V4 of Madracis auretenra: coral microbiome	AMPLICON	METAGENOMIC	ChIP	paired	ILLUMINA	Illumina MiSeq	16S rRNA V4 two-step PCR, CS1 and CS2 adapters	fastq	1256-437-Ma-46_S226_L001_R1_001.fastq	1256-437-Ma-46_S226_L001_R2_001.fastq
SRR28786301	SRP503687	new	PRJNA1103847	SAMN41063050	1256-438	16S rRNA V4 of Madracis auretenra: coral microbiome	AMPLICON	METAGENOMIC	ChIP	paired	ILLUMINA	Illumina MiSeq	16S rRNA V4 two-step PCR, CS1 and CS2 adapters	fastq	1256-438-Ma-47_S227_L001_R1_001.fastq	1256-438-Ma-47_S227_L001_R2_001.fastq
SRR28786300	SRP503687	new	PRJNA1103847	SAMN41063051	1256-439	16S rRNA V4 of Madracis auretenra: coral microbiome	AMPLICON	METAGENOMIC	ChIP	paired	ILLUMINA	Illumina MiSeq	16S rRNA V4 two-step PCR, CS1 and CS2 adapters	fastq	1256-439-Ma-48_S228_L001_R1_001.fastq	1256-439-Ma-48_S228_L001_R2_001.fastq
SRR28786299	SRP503687	new	PRJNA1103847	SAMN41063052	1256-440	16S rRNA V4 of Madracis auretenra: coral microbiome	AMPLICON	METAGENOMIC	ChIP	paired	ILLUMINA	Illumina MiSeq	16S rRNA V4 two-step PCR, CS1 and CS2 adapters	fastq	1256-440-Ma-49_S229_L001_R1_001.fastq	1256-440-Ma-49_S229_L001_R2_001.fastq
SRR28786298	SRP503687	new	PRJNA1103847	SAMN41063053	1256-441	16S rRNA V4 of Madracis auretenra: coral microbiome	AMPLICON	METAGENOMIC	ChIP	paired	ILLUMINA	Illumina MiSeq	16S rRNA V4 two-step PCR, CS1 and CS2 adapters	fastq	1256-441-Ma-50_S230_L001_R1_001.fastq	1256-441-Ma-50_S230_L001_R2_001.fastq
SRR28786296	SRP503687	new	PRJNA1103847	SAMN41063054	1256-442	16S rRNA V4 of Madracis auretenra: coral microbiome	AMPLICON	METAGENOMIC	ChIP	paired	ILLUMINA	Illumina MiSeq	16S rRNA V4 two-step PCR, CS1 and CS2 adapters	fastq	1256-442-Ma-51_S231_L001_R1_001.fastq	1256-442-Ma-51_S231_L001_R2_001.fastq
SRR28786295	SRP503687	new	PRJNA1103847	SAMN41063055	1256-443	16S rRNA V4 of Madracis auretenra: coral microbiome	AMPLICON	METAGENOMIC	ChIP	paired	ILLUMINA	Illumina MiSeq	16S rRNA V4 two-step PCR, CS1 and CS2 adapters	fastq	1256-443-Ma-52_S232_L001_R1_001.fastq	1256-443-Ma-52_S232_L001_R2_001.fastq
SRR28786294	SRP503687	new	PRJNA1103847	SAMN41063056	1256-444	16S rRNA V4 of surrounding seawater: seawater microbiome	AMPLICON	METAGENOMIC	ChIP	paired	ILLUMINA	Illumina MiSeq	16S rRNA V4 two-step PCR, CS1 and CS2 adapters	fastq	1256-444-Ma-53_S233_L001_R1_001.fastq	1256-444-Ma-53_S233_L001_R2_001.fastq
SRR28786293	SRP503687	new	PRJNA1103847	SAMN41063057	1256-445	16S rRNA V4 of surrounding seawater: seawater microbiome	AMPLICON	METAGENOMIC	ChIP	paired	ILLUMINA	Illumina MiSeq	16S rRNA V4 two-step PCR, CS1 and CS2 adapters	fastq	1256-445-Ma-54_S234_L001_R1_001.fastq	1256-445-Ma-54_S234_L001_R2_001.fastq
SRR28786292	SRP503687	new	PRJNA1103847	SAMN41063058	1256-446	16S rRNA V4 of Madracis auretenra: coral microbiome	AMPLICON	METAGENOMIC	ChIP	paired	ILLUMINA	Illumina MiSeq	16S rRNA V4 two-step PCR, CS1 and CS2 adapters	fastq	1256-446-Ma-55_S256_L001_R1_001.fastq	1256-446-Ma-55_S256_L001_R2_001.fastq
SRR28786291	SRP503687	new	PRJNA1103847	SAMN41063059	1256-447	16S rRNA V4 of Madracis auretenra: coral microbiome	AMPLICON	METAGENOMIC	ChIP	paired	ILLUMINA	Illumina MiSeq	16S rRNA V4 two-step PCR, CS1 and CS2 adapters	fastq	1256-447-Ma-56_S257_L001_R1_001.fastq	1256-447-Ma-56_S257_L001_R2_001.fastq
SRR28786290	SRP503687	new	PRJNA1103847	SAMN41063060	1256-448	16S rRNA V4 of Madracis auretenra: coral microbiome	AMPLICON	METAGENOMIC	ChIP	paired	ILLUMINA	Illumina MiSeq	16S rRNA V4 two-step PCR, CS1 and CS2 adapters	fastq	1256-448-Ma-57_S258_L001_R1_001.fastq	1256-448-Ma-57_S258_L001_R2_001.fastq
SRR28786289	SRP503687	new	PRJNA1103847	SAMN41063061	1256-449	16S rRNA V4 of Madracis auretenra: coral microbiome	AMPLICON	METAGENOMIC	ChIP	paired	ILLUMINA	Illumina MiSeq	16S rRNA V4 two-step PCR, CS1 and CS2 adapters	fastq	1256-449-Ma-58_S259_L001_R1_001.fastq	1256-449-Ma-58_S259_L001_R2_001.fastq
SRR28786288	SRP503687	new	PRJNA1103847	SAMN41063062	1256-450	16S rRNA V4 of Madracis auretenra: coral microbiome	AMPLICON	METAGENOMIC	ChIP	paired	ILLUMINA	Illumina MiSeq	16S rRNA V4 two-step PCR, CS1 and CS2 adapters	fastq	1256-450-Ma-59_S260_L001_R1_001.fastq	1256-450-Ma-59_S260_L001_R2_001.fastq
SRR28786287	SRP503687	new	PRJNA1103847	SAMN41063063	1256-451	16S rRNA V4 of Madracis auretenra: coral microbiome	AMPLICON	METAGENOMIC	ChIP	paired	ILLUMINA	Illumina MiSeq	16S rRNA V4 two-step PCR, CS1 and CS2 adapters	fastq	1256-451-Ma-60_S261_L001_R1_001.fastq	1256-451-Ma-60_S261_L001_R2_001.fastq
SRR28786285	SRP503687	new	PRJNA1103847	SAMN41063064	1256-452	16S rRNA V4 of Madracis auretenra: coral microbiome	AMPLICON	METAGENOMIC	ChIP	paired	ILLUMINA	Illumina MiSeq	16S rRNA V4 two-step PCR, CS1 and CS2 adapters	fastq	1256-452-Ma-61_S262_L001_R1_001.fastq	1256-452-Ma-61_S262_L001_R2_001.fastq
SRR28786284	SRP503687	new	PRJNA1103847	SAMN41063065	1256-453	16S rRNA V4 of Madracis auretenra: coral microbiome	AMPLICON	METAGENOMIC	ChIP	paired	ILLUMINA	Illumina MiSeq	16S rRNA V4 two-step PCR, CS1 and CS2 adapters	fastq	1256-453-Ma-62_S263_L001_R1_001.fastq	1256-453-Ma-62_S263_L001_R2_001.fastq
SRR28786283	SRP503687	new	PRJNA1103847	SAMN41063066	1256-454	16S rRNA V4 of Madracis auretenra: coral microbiome	AMPLICON	METAGENOMIC	ChIP	paired	ILLUMINA	Illumina MiSeq	16S rRNA V4 two-step PCR, CS1 and CS2 adapters	fastq	1256-454-Ma-63_S264_L001_R1_001.fastq	1256-454-Ma-63_S264_L001_R2_001.fastq
SRR28786282	SRP503687	new	PRJNA1103847	SAMN41063067	1256-455	16S rRNA V4 of Madracis auretenra: coral microbiome	AMPLICON	METAGENOMIC	ChIP	paired	ILLUMINA	Illumina MiSeq	16S rRNA V4 two-step PCR, CS1 and CS2 adapters	fastq	1256-455-Ma-64_S265_L001_R1_001.fastq	1256-455-Ma-64_S265_L001_R2_001.fastq
SRR28786281	SRP503687	new	PRJNA1103847	SAMN41063068	1256-456	16S rRNA V4 of Madracis auretenra: coral microbiome	AMPLICON	METAGENOMIC	ChIP	paired	ILLUMINA	Illumina MiSeq	16S rRNA V4 two-step PCR, CS1 and CS2 adapters	fastq	1256-456-Ma-65_S266_L001_R1_001.fastq	1256-456-Ma-65_S266_L001_R2_001.fastq
SRR28786280	SRP503687	new	PRJNA1103847	SAMN41063069	1256-457	16S rRNA V4 of Madracis auretenra: coral microbiome	AMPLICON	METAGENOMIC	ChIP	paired	ILLUMINA	Illumina MiSeq	16S rRNA V4 two-step PCR, CS1 and CS2 adapters	fastq	1256-457-Ma-66_S267_L001_R1_001.fastq	1256-457-Ma-66_S267_L001_R2_001.fastq
SRR28786279	SRP503687	new	PRJNA1103847	SAMN41063070	1256-458	16S rRNA V4 of Madracis auretenra: coral microbiome	AMPLICON	METAGENOMIC	ChIP	paired	ILLUMINA	Illumina MiSeq	16S rRNA V4 two-step PCR, CS1 and CS2 adapters	fastq	1256-458-Ma-67_S268_L001_R1_001.fastq	1256-458-Ma-67_S268_L001_R2_001.fastq
SRR28786318	SRP503687	new	PRJNA1103847	SAMN41063071	1256-459	16S rRNA V4 of Madracis auretenra: coral microbiome	AMPLICON	METAGENOMIC	ChIP	paired	ILLUMINA	Illumina MiSeq	16S rRNA V4 two-step PCR, CS1 and CS2 adapters	fastq	1256-459-Ma-68_S269_L001_R1_001.fastq	1256-459-Ma-68_S269_L001_R2_001.fastq
SRR28786317	SRP503687	new	PRJNA1103847	SAMN41063072	1256-460	16S rRNA V4 of Madracis auretenra: coral microbiome	AMPLICON	METAGENOMIC	ChIP	paired	ILLUMINA	Illumina MiSeq	16S rRNA V4 two-step PCR, CS1 and CS2 adapters	fastq	1256-460-Ma-69_S270_L001_R1_001.fastq	1256-460-Ma-69_S270_L001_R2_001.fastq
SRR28786316	SRP503687	new	PRJNA1103847	SAMN41063073	1256-461	16S rRNA V4 of Madracis auretenra: coral microbiome	AMPLICON	METAGENOMIC	ChIP	paired	ILLUMINA	Illumina MiSeq	16S rRNA V4 two-step PCR, CS1 and CS2 adapters	fastq	1256-461-Ma-70_S271_L001_R1_001.fastq	1256-461-Ma-70_S271_L001_R2_001.fastq
SRR28786314	SRP503687	new	PRJNA1103847	SAMN41063074	1256-462	16S rRNA V4 of surrounding seawater: seawater microbiome	AMPLICON	METAGENOMIC	ChIP	paired	ILLUMINA	Illumina MiSeq	16S rRNA V4 two-step PCR, CS1 and CS2 adapters	fastq	1256-462-Ma-71_S272_L001_R1_001.fastq	1256-462-Ma-71_S272_L001_R2_001.fastq
SRR28786313	SRP503687	new	PRJNA1103847	SAMN41063075	1256-463	16S rRNA V4 of surrounding seawater: seawater microbiome	AMPLICON	METAGENOMIC	ChIP	paired	ILLUMINA	Illumina MiSeq	16S rRNA V4 two-step PCR, CS1 and CS2 adapters	fastq	1256-463-Ma-72_S273_L001_R1_001.fastq	1256-463-Ma-72_S273_L001_R2_001.fastq
